# Supplementary material for: Combined Treatment with Acalabrutinib and Rapamycin Inhibits Glioma Stem Cells and Promotes Vascular Normalization by Downregulating BTK/mTOR/VEGF Signaling
Source: Pharmaceuticals (Basel). 2021 Aug 29;14(9):876. doi: 10.3390/ph14090876 (PMC8464793; doi:10.3390/ph14090876)
Supplement: Supplementary file 1 [file pharmaceuticals-14-00876-s001.zip › pharmaceuticals-1319121-supplementary.pdf]

## SUPPLEMENTARY INFORMATION

### **Combined treatment with acalabrutinib and rapamycin inhibits glioma stem cells and promotes vascular normalization by downregulating BTK/mTOR/VEGF signaling**

Yu-Kai Su<sup>1,2,3,4</sup>, Oluwaseun Adebayo Bamodu<sup>5</sup>, I-Chang Su<sup>1,2,3,4</sup>, Narpati Wesa Pikatan<sup>5,6</sup>, Iat-Hang Fong<sup>1,2,3,4</sup>, Wei-Hwa Lee<sup>7</sup>, Chi-Tai Yeh<sup>5,8</sup>, Hsiao-Yean Chiu<sup>9\*</sup> and Chien-Min Lin<sup>1,2,3,4,\*</sup>

1 Graduate Institute of Clinical Medicine, College of Medicine, Taipei Medical University, Taipei City 11031, Taiwan.

2 Department of Neurology, School of Medicine, College of Medicine, Taipei Medical University, Taipei City 11031, Taiwan.

3 Division of Neurosurgery, Department of Surgery, Taipei Medical University-Shuang Ho Hospital, New Taipei City 23561, Taiwan.

4 Taipei Neuroscience Institute, Taipei Medical University, Taipei 11031, Taiwan.

5 Department of Medical Research & Education, Taipei Medical University-Shuang Ho Hospital, New Taipei City 23561, Taiwan.

6 Doctorate Program of Medical and Health Science, Faculty of Medicine, Public Health, and Nursing, Universitas Gadjah Mada, 55281, Yogyakarta, Indonesia.

7 Department of Pathology, Taipei Medical University-Shuang Ho Hospital, New Taipei City, Taiwan.

8 Department of Medical Laboratory Science and Biotechnology, Yuanpei University of Medical Technology, Hsinchu 300, Taiwan.

9 College of Nursing, Taipei Medical University, Taipei, Taiwan.

\*Corresponding author

Dr. Chien-Min Lin, Division of Neurosurgery, Department of Surgery, Taipei Medical University-Shuang Ho Hospital, New Taipei City 23561, Taiwan. E-mail: [m513092004@tmu.edu.tw](mailto:m513092004@tmu.edu.tw)

Dr. Hsiao-Yean Chiu, College of Nursing, Taipei Medical University, Taipei, Taiwan. E-mail: [hychiu0315@tmu.edu.tw](mailto:hychiu0315@tmu.edu.tw)

**Supplementary Table S1. Western blot antibodies sheet.**

| No. | Target | Dilution | MW      | Source     |                |
|-----|--------|----------|---------|------------|----------------|
| 1   | SOX2   | 1:1000   | 43      | ab97959    | Abcam          |
| 2   | 4-Oct  | 1:1000   | 45      | ab200834   | Abcam          |
| 3   | CD133  | 1:1000   | 120     | ab216323   | Abcam          |
| 4   | NANOG  | 1:1000   | 37      | ab109250   | Abcam          |
| 5   | GFAP   | 1:1000   | 53      | ab7260     | Abcam          |
| 6   | NEFL   | 1:1000   | 180-220 | MA5-14981  | Abcam          |
| 7   | p-BTK  | 1:1000   | 77      | #5082      | Cell Signaling |
| 8   | BTK    | 1:1000   | 77      | #8547      | Cell Signaling |
| 9   | p-AKT  | 1:1000   | 60      | #4060      | Cell Signaling |
| 10  | AKT    | 1:1000   | 60      | #4685      | Cell Signaling |
| 11  | p-mTOR | 1:1000   | 289     | #5536      | Cell Signaling |
| 12  | mTOR   | 1:1000   | 289     | #2983      | Cell Signaling |
| 13  | p-S6k  | 1:1000   | 70      | #9204      | Cell Signaling |
| 14  | S6K    | 1:1000   | 70      | #2708      | Cell Signaling |
| 15  | GAPDH  | 1:1000   | 42      | 60004-1-Ig | proteintech    |
| 16  | ANGPT1 | 1:1000   | 14      | sc-74528   | santa cruz     |
| 17  | ANGPT2 | 1:1000   | 62-70   | sc-74403   | santa cruz     |
| 18  | VEGF   | 1:1000   | 21      | sc-7269    | santa cruz     |
| 19  | Nestin | 1:1000   | 250     | MA1-110    | Thermo         |
| 20  | KLF4   | 1:1000   | 55      | MA5-15672  | Thermo         |

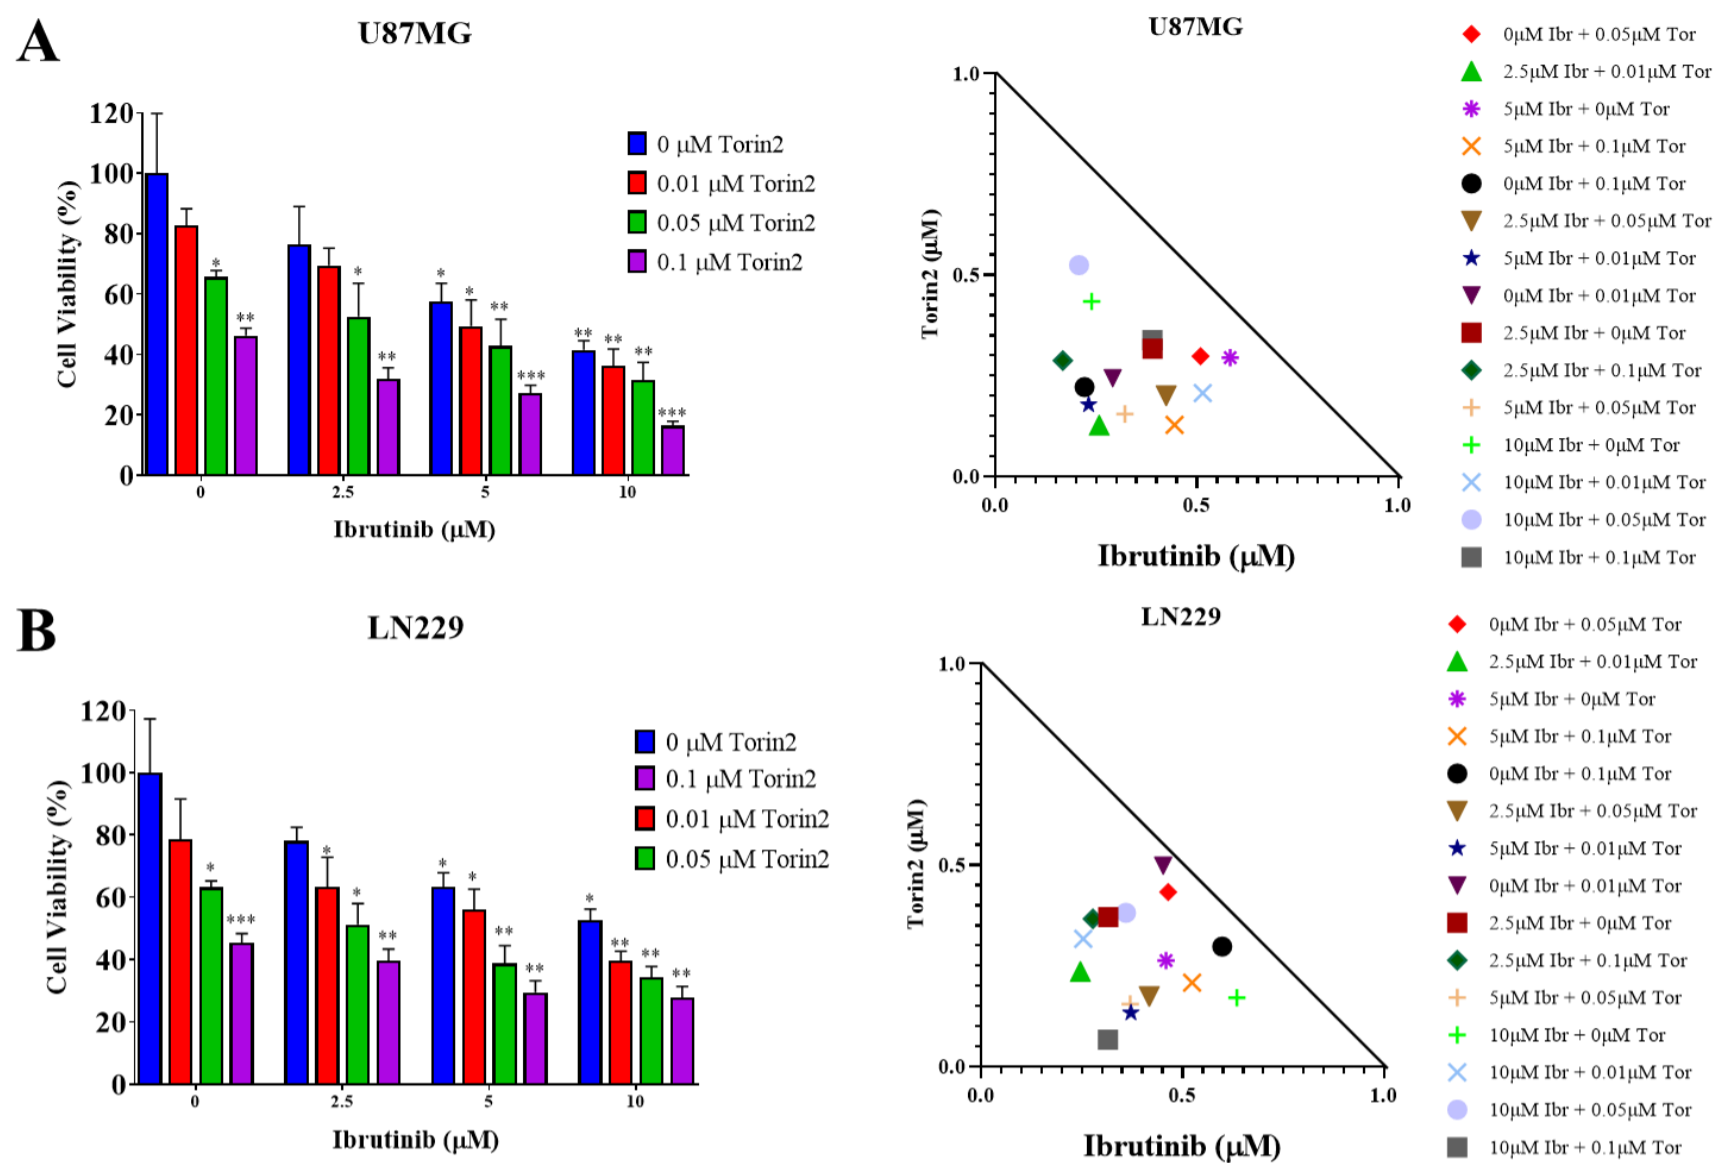

**Supplementary Figure S1. Combined Ibrutinib and Torin2 exhibits synergism.**

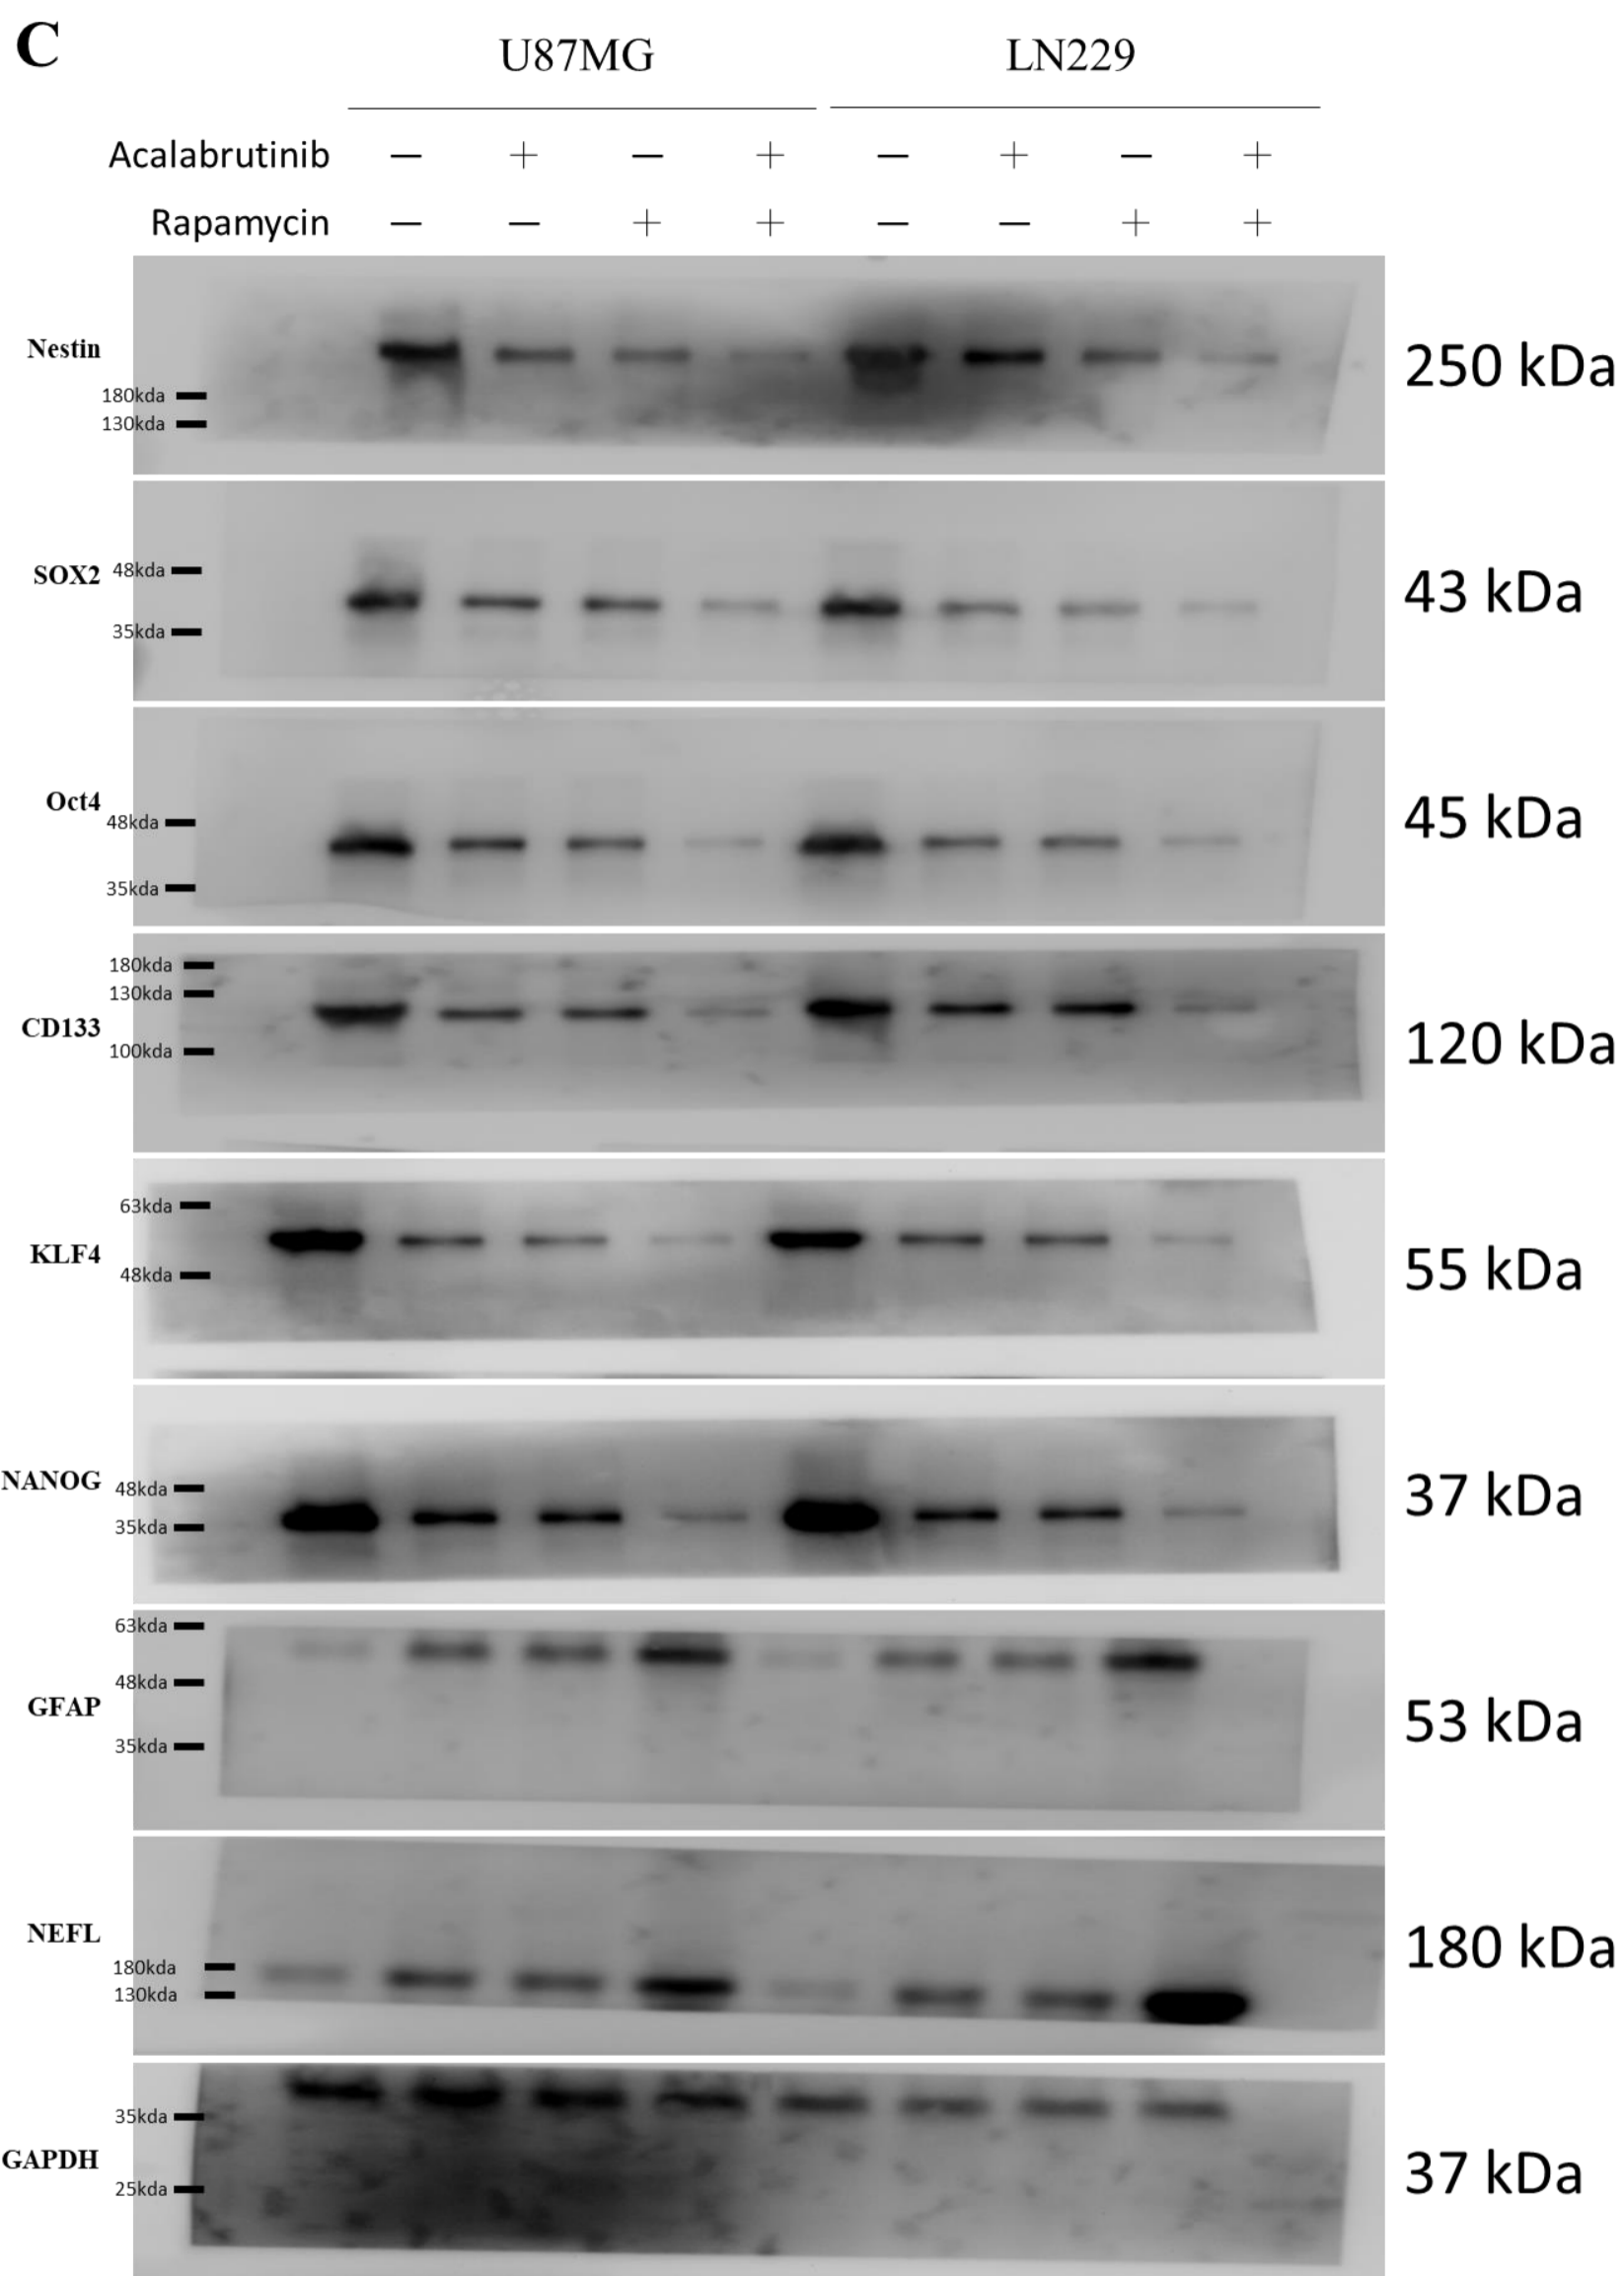

Supplementary Figure S2. Full-size blots of Figure 2C

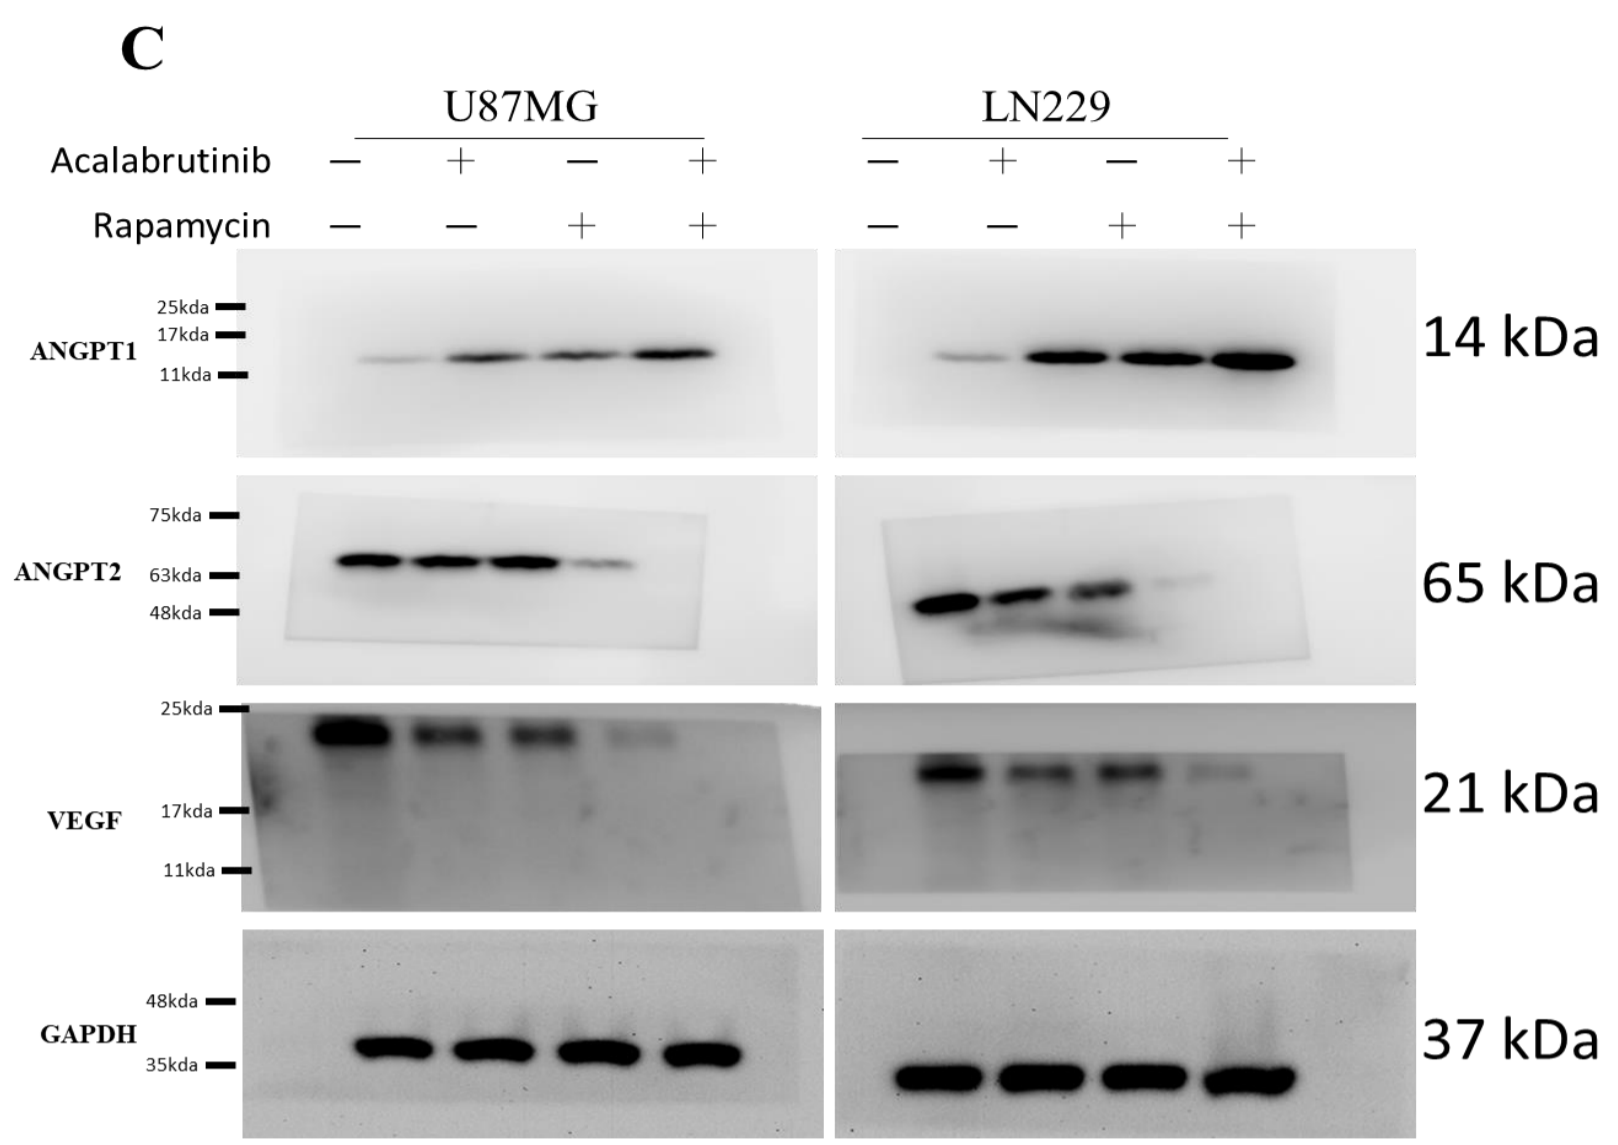

**Supplementary Figure S3. Full-size blots of Figure 4C**

**A**

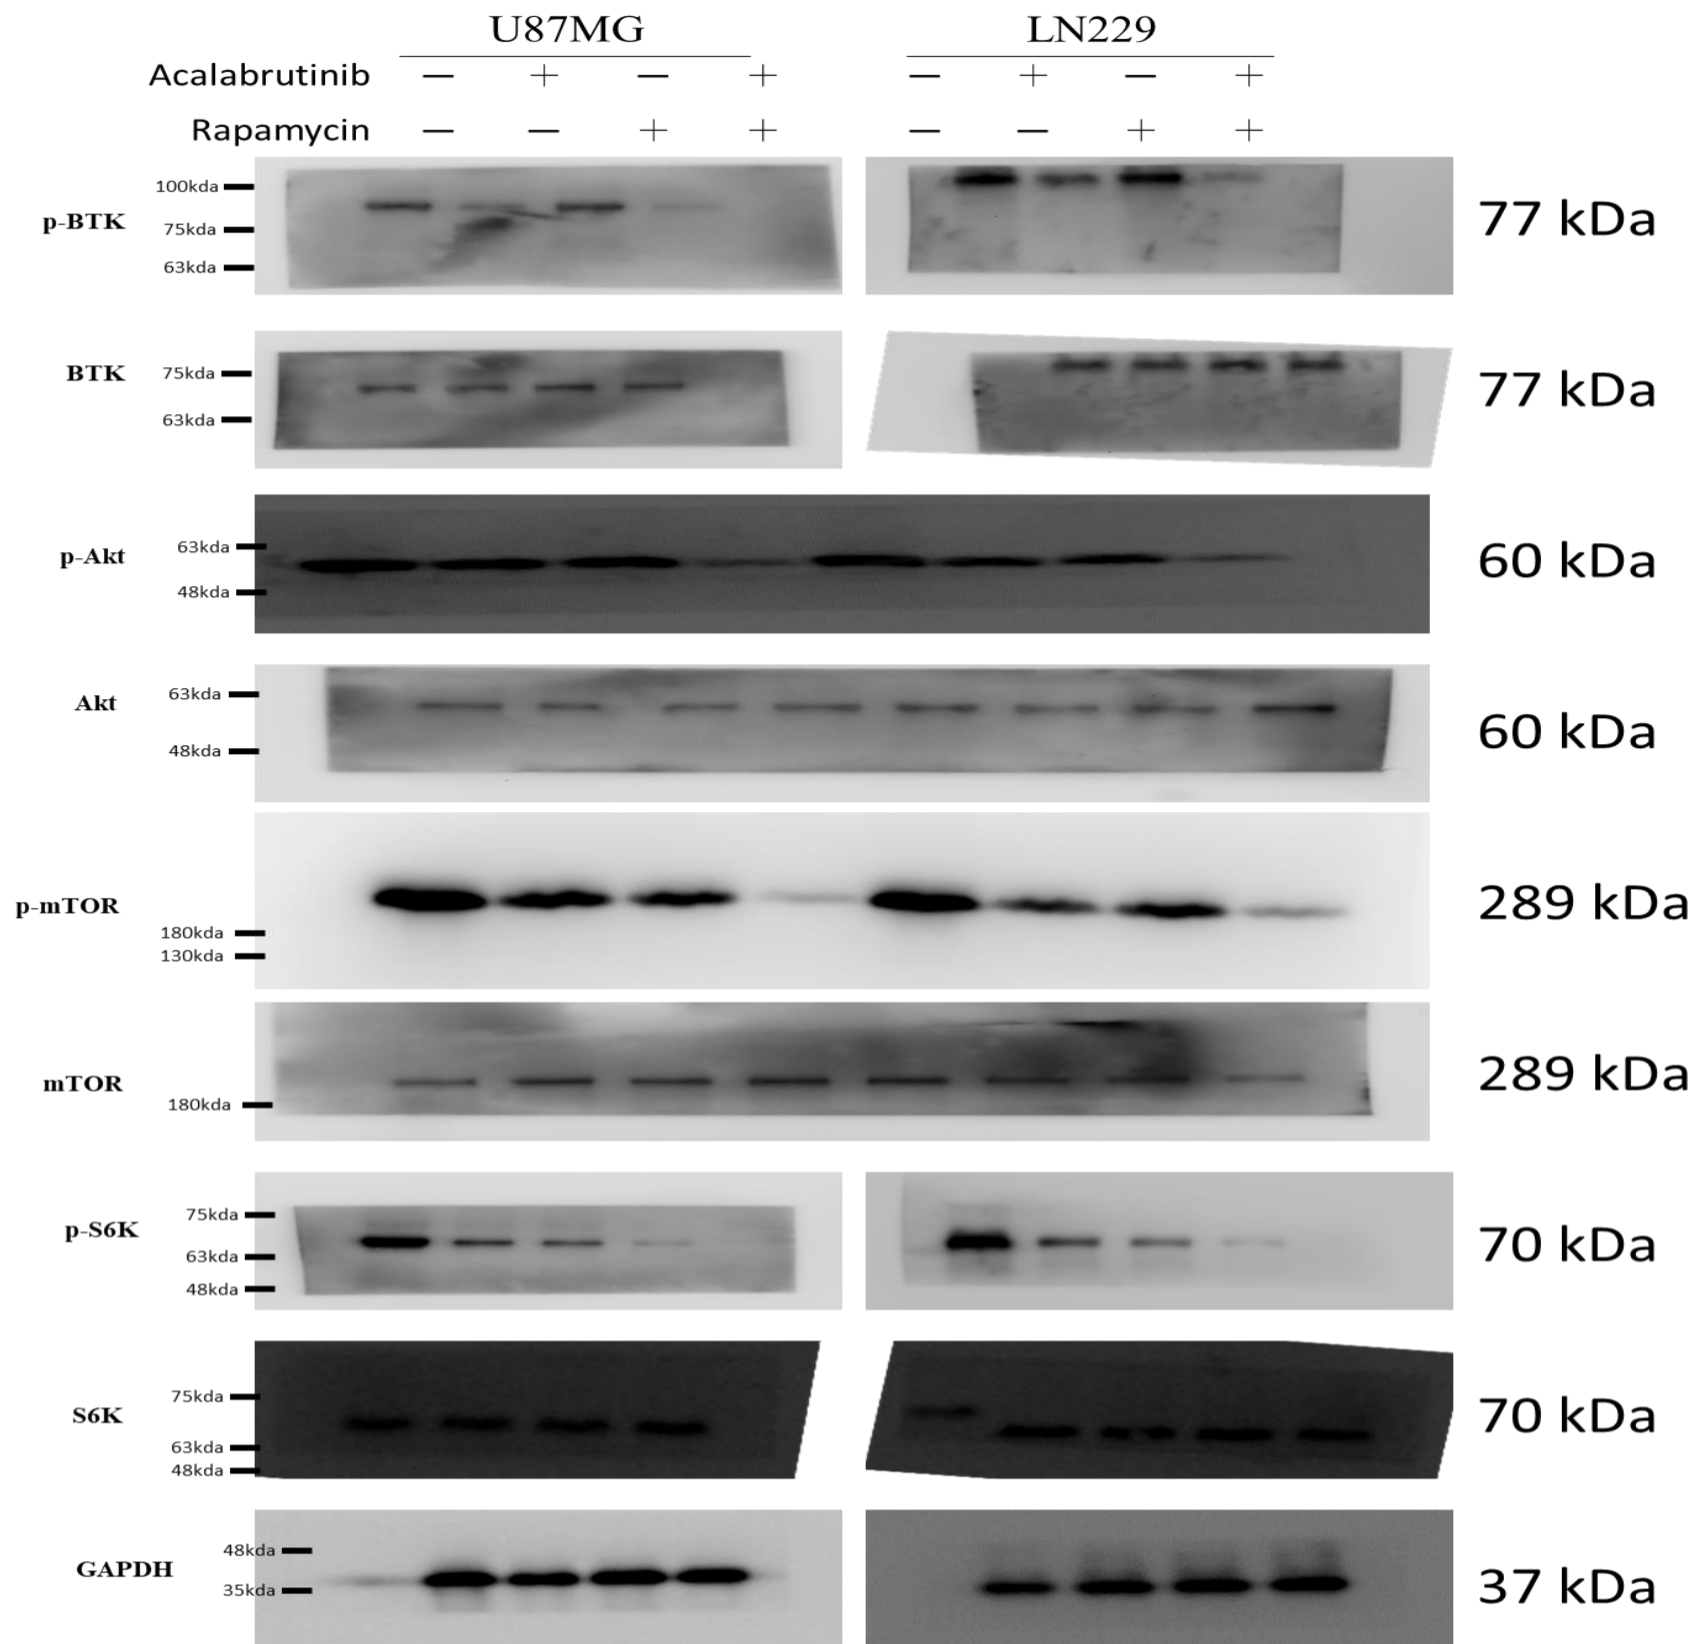

Supplementary Figure S4. Full-size blots of Figure 5A
